# Supplementary material for: A Study into the γ-Al2O3 Binder Influence on Nano-H-ZSM-5 via Scaled-Up Laboratory Methanol-to-Hydrocarbon Reaction
Source: MDPI journal article supplement (doi:10.3390/catal11101140), 2021-09-23
Supplement: s1 [file s1]

# **Scaled-up laboratory test of shaped nano H-ZSM-5 based catalysts for methanol-to-hydrocarbon study**

Bonan Liu<sup>1\*</sup>, Xiaochun Zhu<sup>1</sup>, Jun Zhao<sup>2</sup>, Duanda Wang<sup>2</sup>, and Wangjing Ma<sup>2\*</sup>

<sup>1</sup>State Key Laboratory of Heavy Oil Processing, China University of Petroleum (Beijing), 18 Fuxue Road, Beijing, 102249, China; liubonan@cup.edu.cn

<sup>2</sup>Technical Institute of Physics and Chemistry, Chinese Academy of Sciences, 29 Zhongguancun East Road, Haidian District, Beijing, 100190, China; wjma@ipc.ac.cn

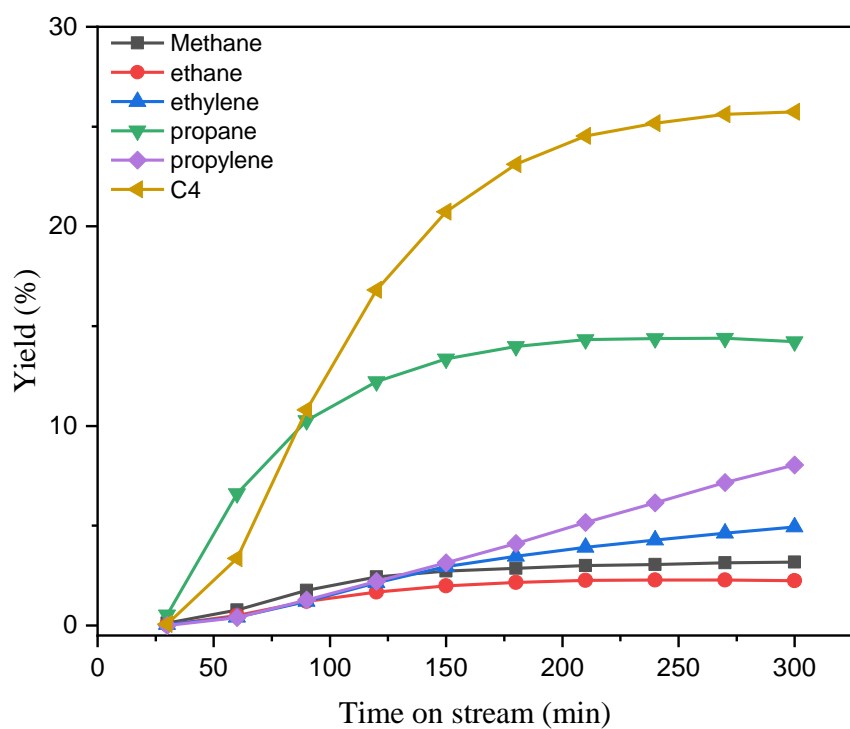

**Figure S1.** 5h C<sub>1</sub>-C<sub>4</sub> product yields, Al-H-ZSM-5 20

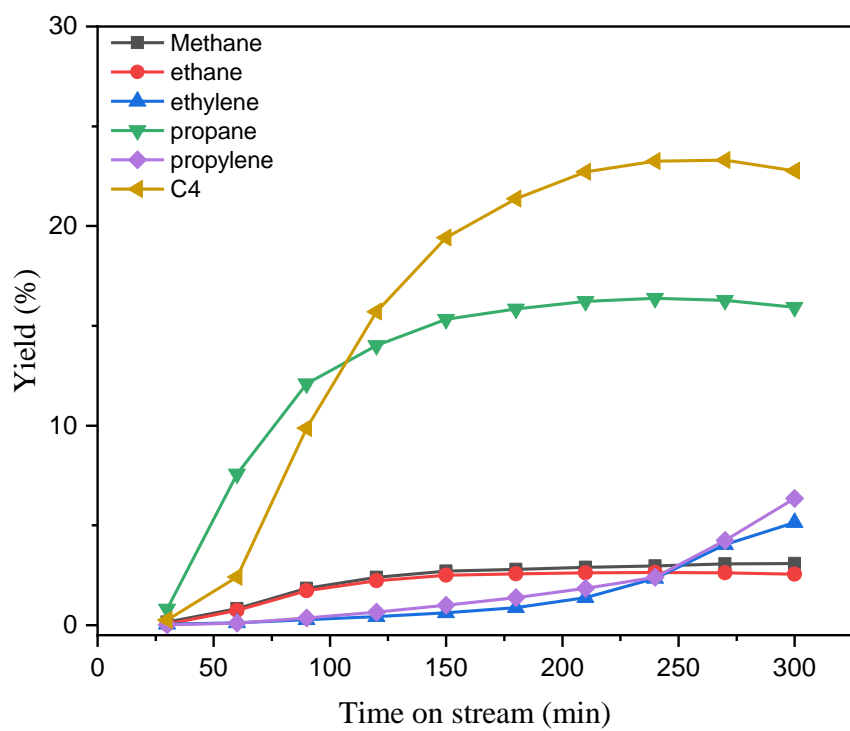

**Figure S2.** 5h C<sub>1</sub>-C<sub>4</sub> product yields, H-ZSM-5 20

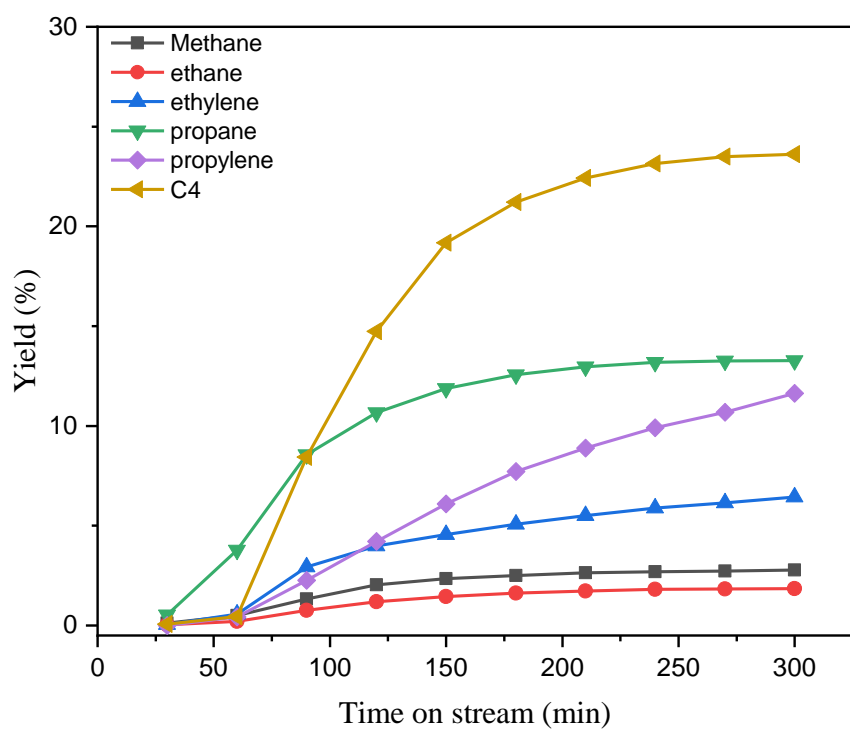

Figure S3. 5h C<sub>1</sub>-C<sub>4</sub> product yields, Al-H-ZSM-5 60

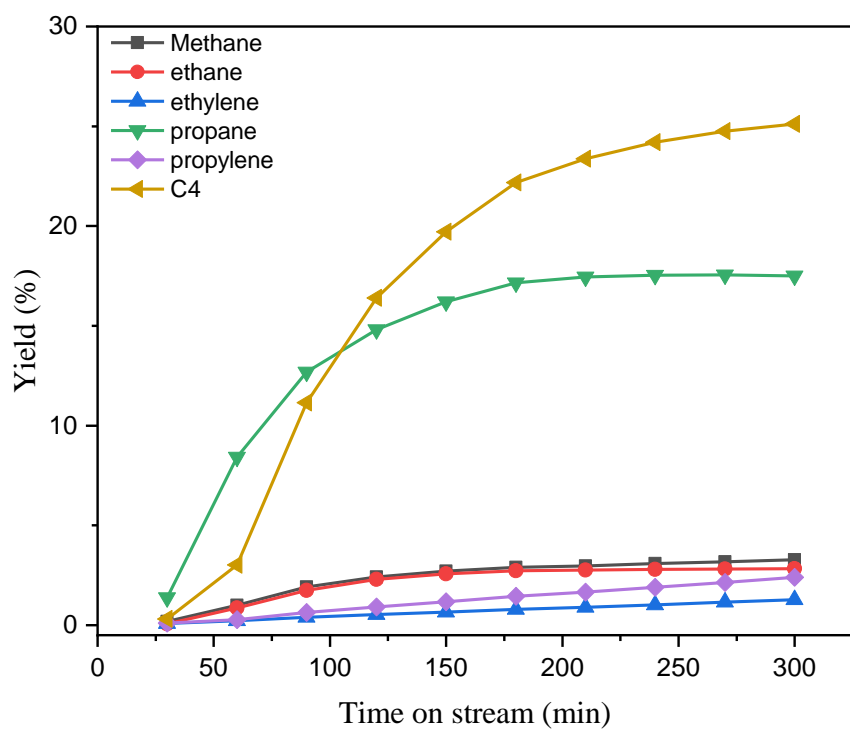

Figure S4. 5h C<sub>1</sub>-C<sub>4</sub> product yields, H-ZSM-5 60

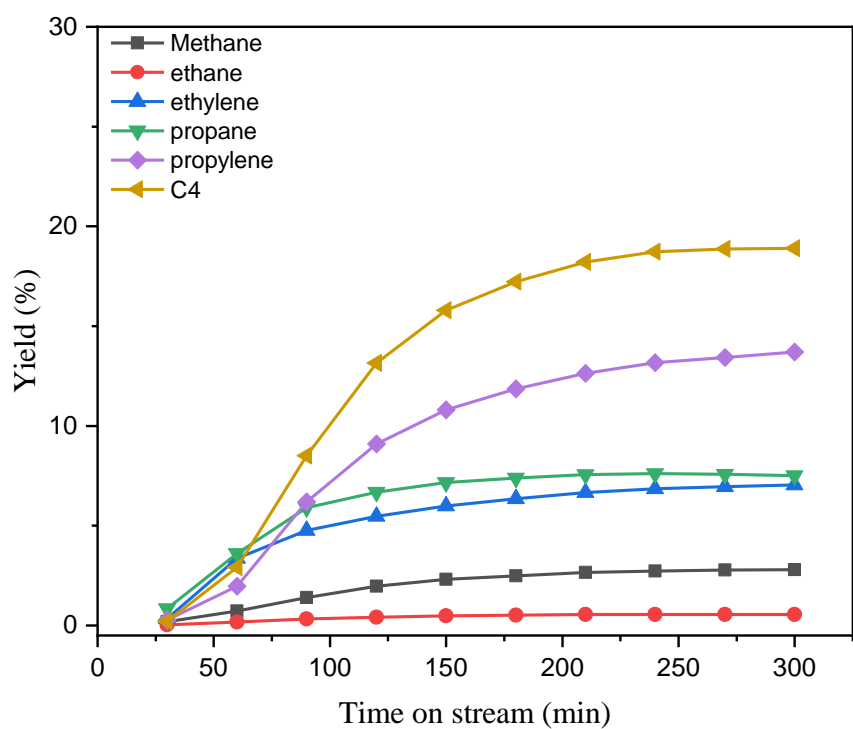

**Figure S5.** 5h C<sub>1</sub>-C<sub>4</sub> product yields, Al-H-ZSM-5 120

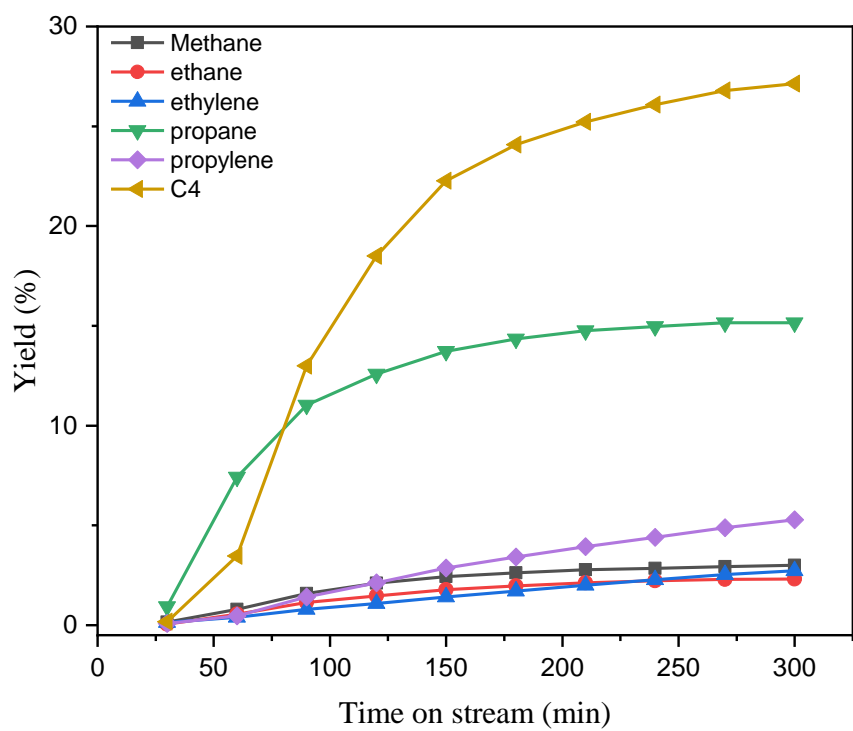

**Figure S6.** 5h C<sub>1</sub>-C<sub>4</sub> product yields, H-ZSM-5 120

**Table.S1** BET surface area of the prepared samples*Pseudo-boehmite uncalcined 205.34 m<sup>2</sup>/g, resultant after calcination 238.04 m<sup>2</sup>/g*

| Samples                                | Surface area m <sup>2</sup> /g |
|----------------------------------------|--------------------------------|
| H-ZSM-5 20 powder                      | 399.89                         |
| Post reaction H-ZSM-5 20 powder        | 202.85                         |
| Al-H-ZSM-5 20 extrudate                | 364.55                         |
| Al-H-ZSM-5 20 powder                   | 361.88                         |
| Post reaction Al-H-ZSM-5 20 extrudate  | 248.12                         |
| H-ZSM-5 60 powder                      | 402.07                         |
| Post reaction H-ZSM-5 60 powder        | 217.7                          |
| Al-H-ZSM-5 60 extrudate                | 366.38                         |
| Al-H-ZSM-5 60 powder                   | 360.75                         |
| Post reaction Al-H-ZSM-5 60 extrudate  | 284.42                         |
| H-ZSM-5 120 powder                     | 403.31                         |
| Post reaction H-ZSM-5 120 powder       | 234.38                         |
| Al-H-ZSM-5 120 extrudate               | 356.83                         |
| Al-H-ZSM-5 120 powder                  | 403.31                         |
| Post reaction Al-H-ZSM-5 120 extrudate | 292.47                         |

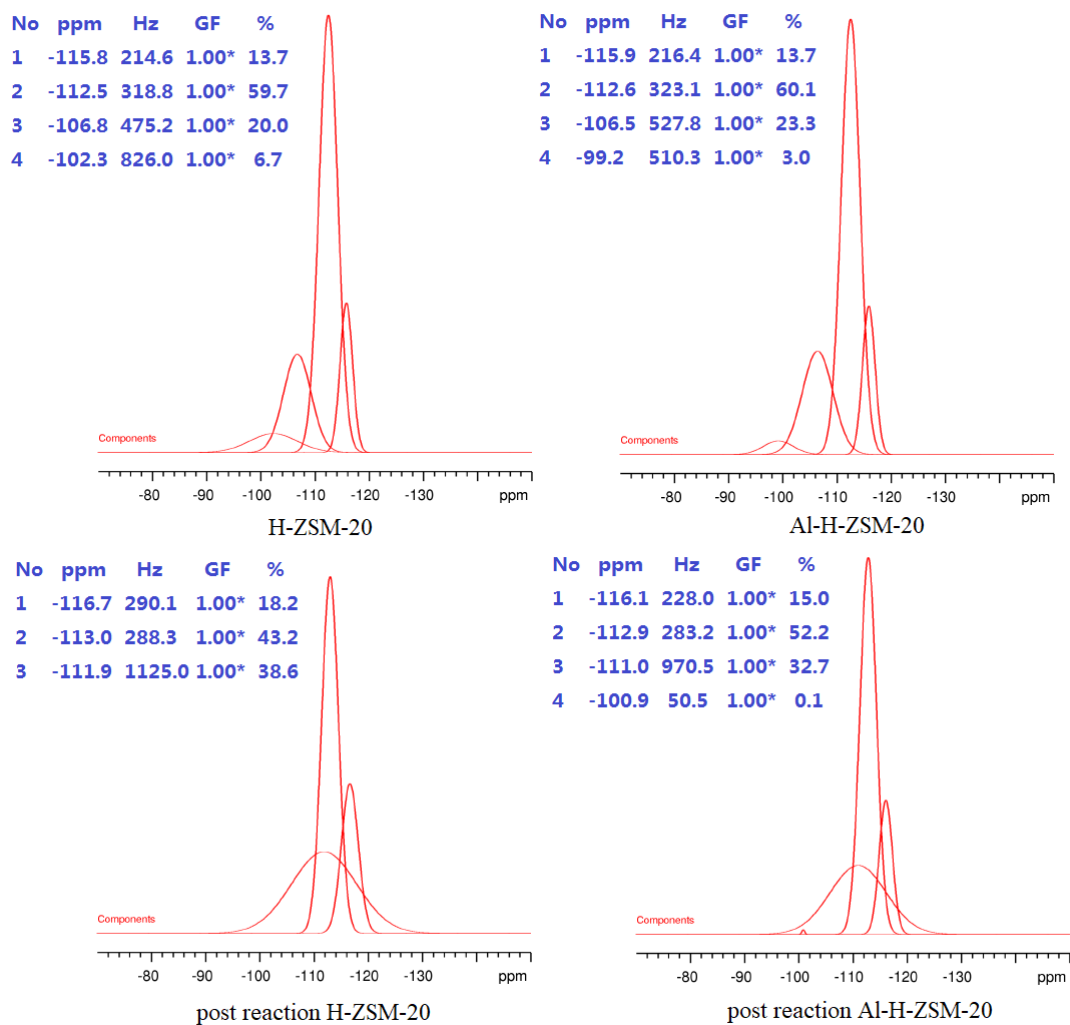

**Figure S7.** de-convoluted  $^{29}\text{Si}$  NMR spectra of samples based on nano H- ZSM-5 (Si/Al=20)

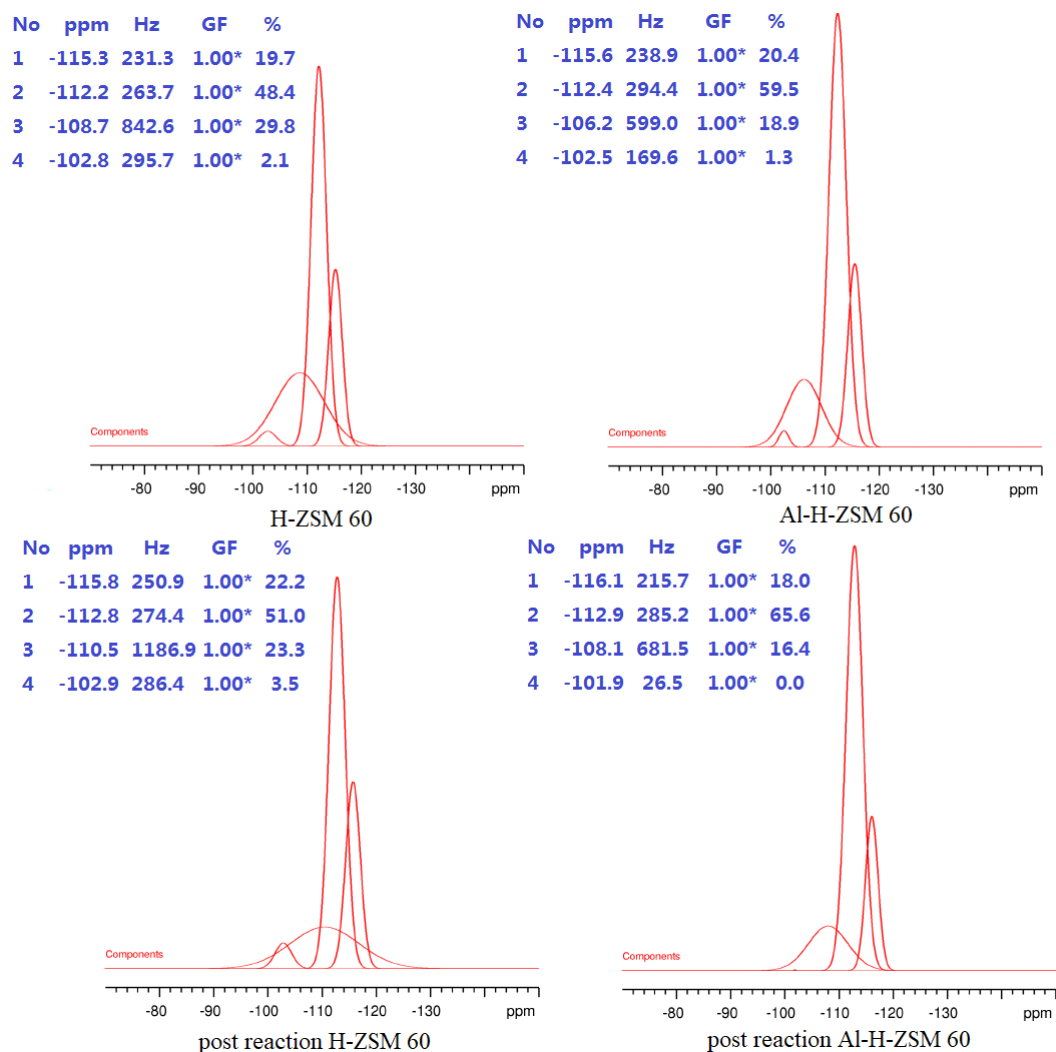

**Figure S8.** de-convoluted  $^{29}\text{Si}$  NMR spectra of samples based on nano H- ZSM-5 (Si/Al=60)

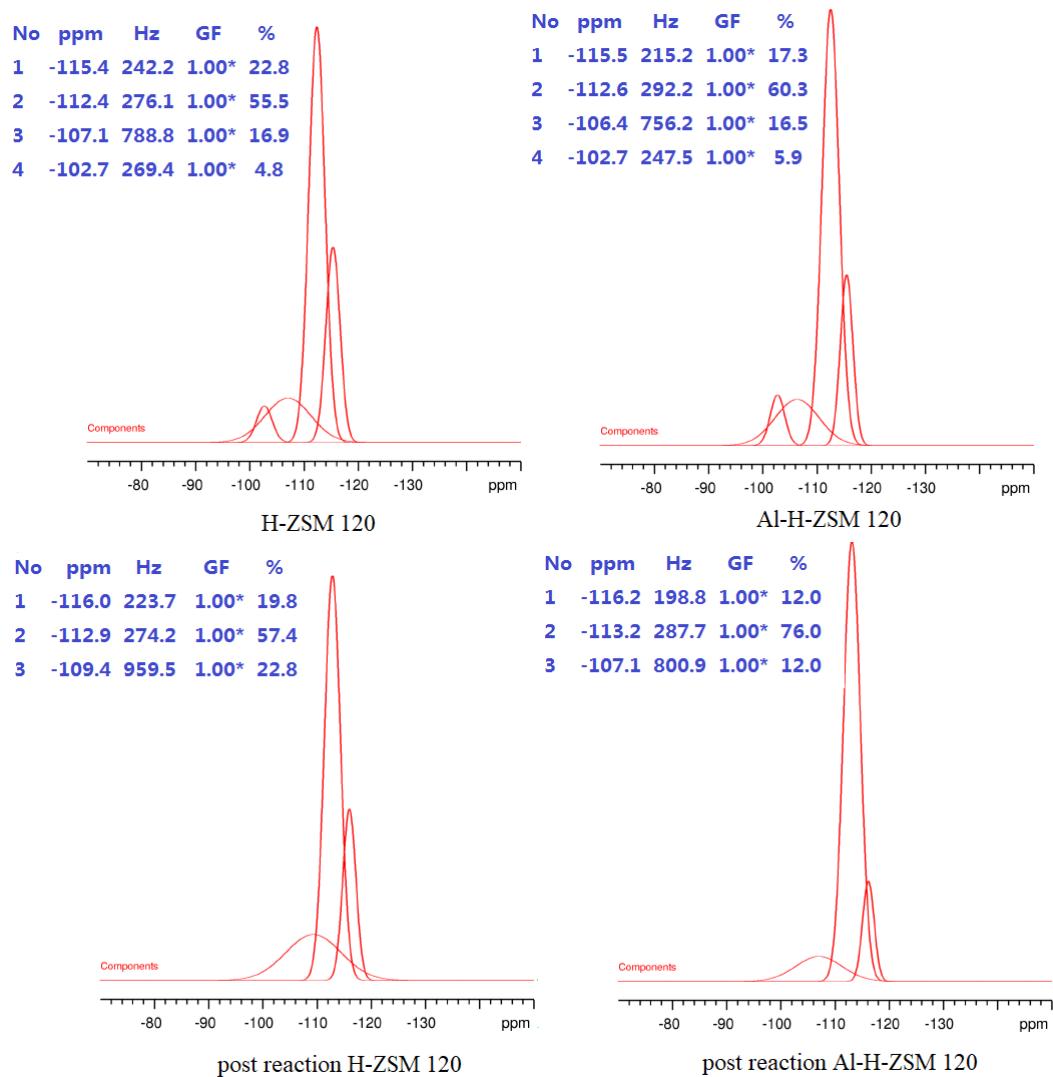

**Figure S9.** de-convoluted  $^{29}\text{Si}$  NMR spectra of samples based on nano H- ZSM-5 (Si/Al=120)



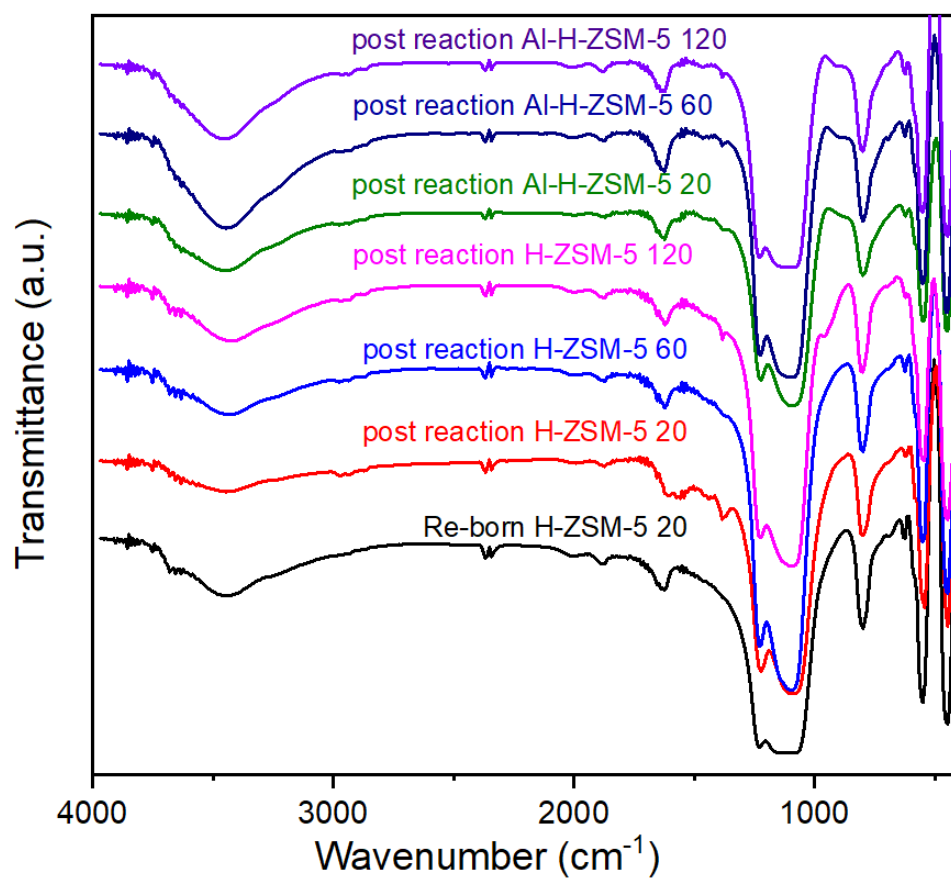

**Figure S10.** FT-IR spectra ( $3500\text{--}400\text{ cm}^{-1}$ ) of coked Al incorporated samples and the original nano H-ZSM-5 zeolites

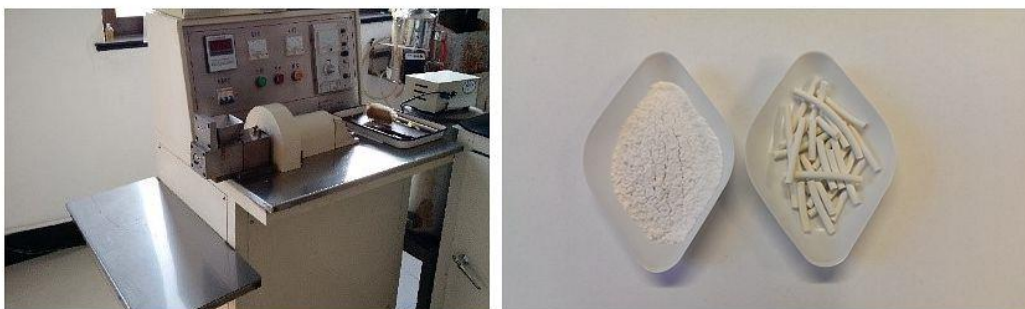

**Figure S11.** Mini industrial screw extruder for catalyst shaping; 1g of parent zeolite (H-ZSM-5 60), and 5g of its extrudate (Al-H-ZSM-5 60)

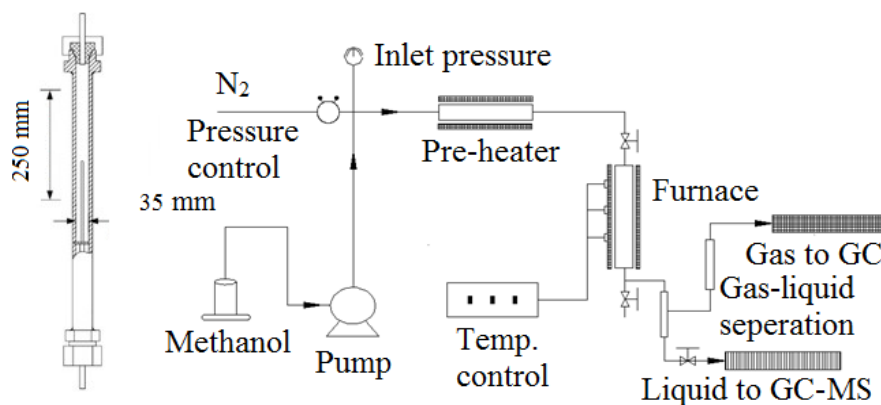

**Figure S12.** Reactor structure with parameters (inner diameter = 23.74 mm, designed available catalyst bed height / inner diameter = 5:1, calculated available catalyst bed height = 118.7mm) and product analysis system
